# Supplementary material for: Facile fabrication of CuO/Cu2O composites with high catalytic performances
Source: Royal Society of Chemistry journal article supplement (doi:10.1039/c6nj03949a), 2017-01-01
Supplement: c6nj03949a1.pdf [file c6nj03949a1.pdf]

## Electronic Supplementary Information

### Facile Fabrication of CuO/Cu<sub>2</sub>O Composites with High Catalytic Performances

Dayeon Choi and Du-Jeon Jang\*

Department of Chemistry, Seoul National University, NS60, Seoul 08826, Republic of Korea

E-mail: [djjang@snu.ac.kr](mailto:djjang@snu.ac.kr)

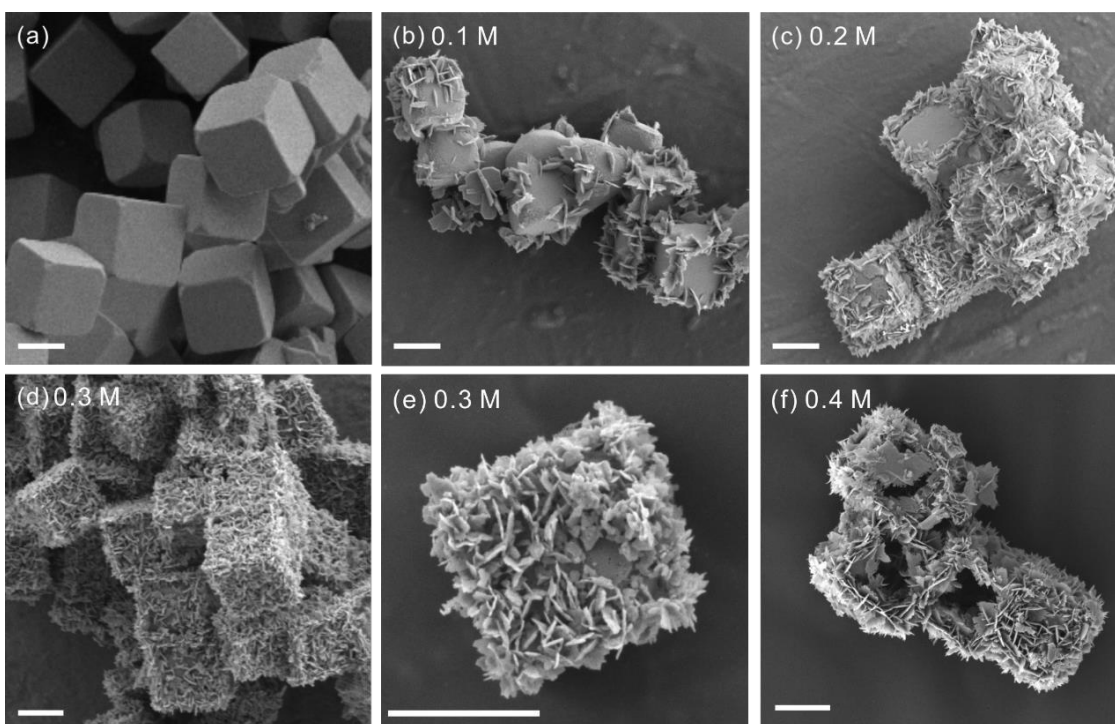

**Fig. S1** FE-SEM images of pristine Cu<sub>2</sub>O cubes (a), and CuO/Cu<sub>2</sub>O composites prepared at respectively indicated concentrations of NaOH(aq) (b-f). Each scale bar indicates 1 μm.

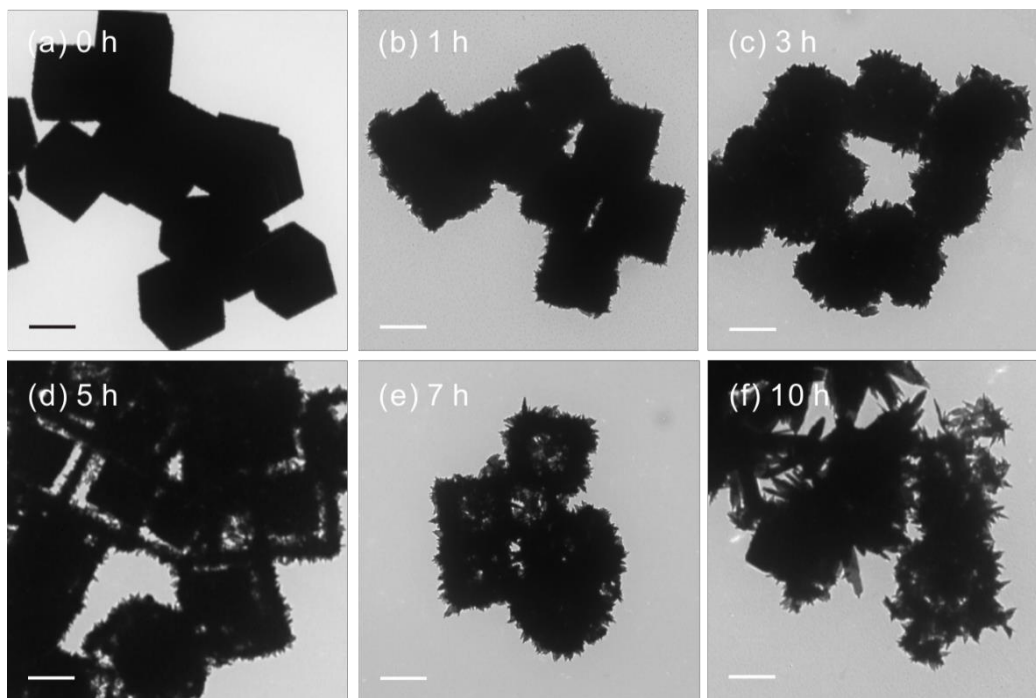

**Fig. S2** TEM images of CuO/Cu<sub>2</sub>O(0.3 M) composites prepared via the wet etching of Cu<sub>2</sub>O cubes for indicated durations.

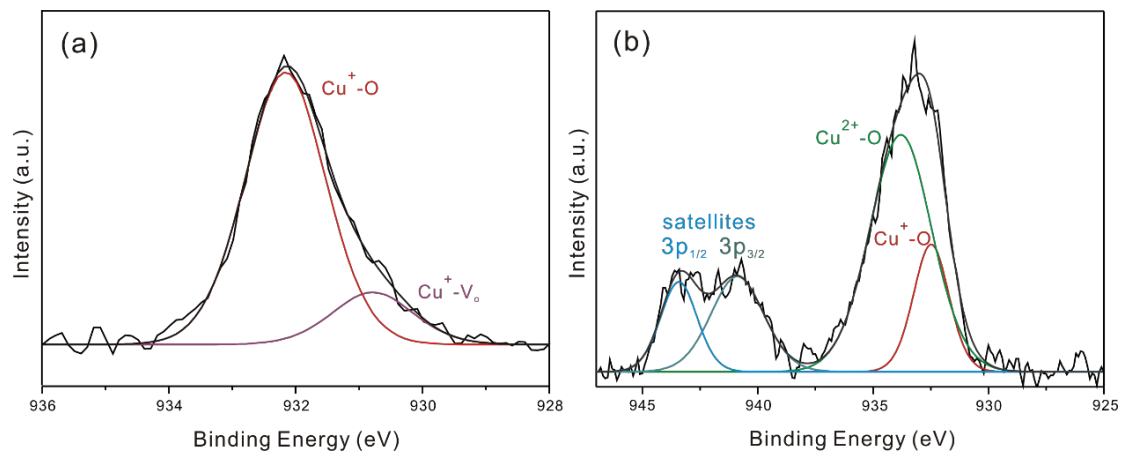

**Fig. S3** Deconvoluted Cu 2p<sub>3/2</sub> XPS curves of pristine Cu<sub>2</sub>O cubes (a), and CuO/Cu<sub>2</sub>O(0.3 M) composites (b).

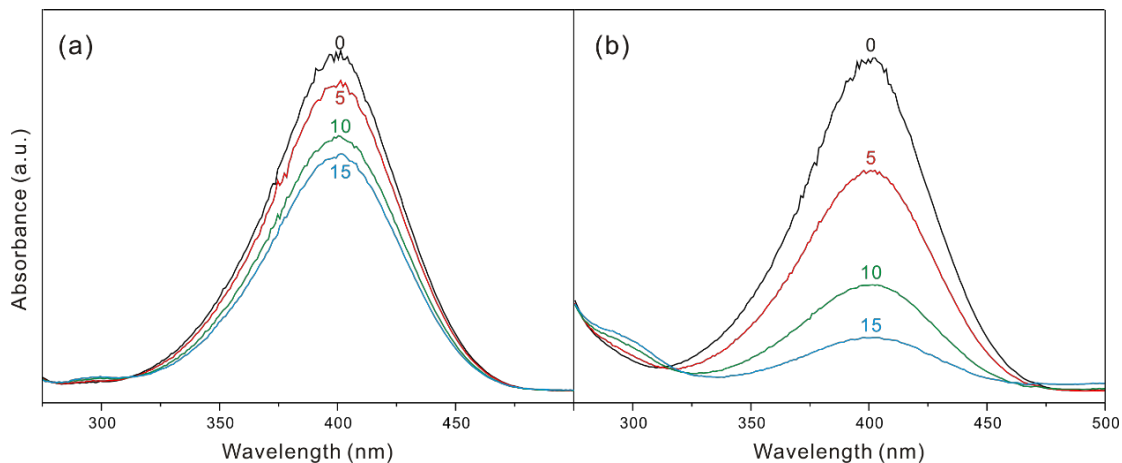

**Fig. S4** Absorption spectra at 30 °C of NaBH<sub>4</sub>-added aqueous 4-NP solutions, measured at elapsed times indicated in the units of min after adding aqueous colloidal solutions of pristine Cu<sub>2</sub>O cubes (a) and CuO/Cu<sub>2</sub>O(0.3 M) composites (b).

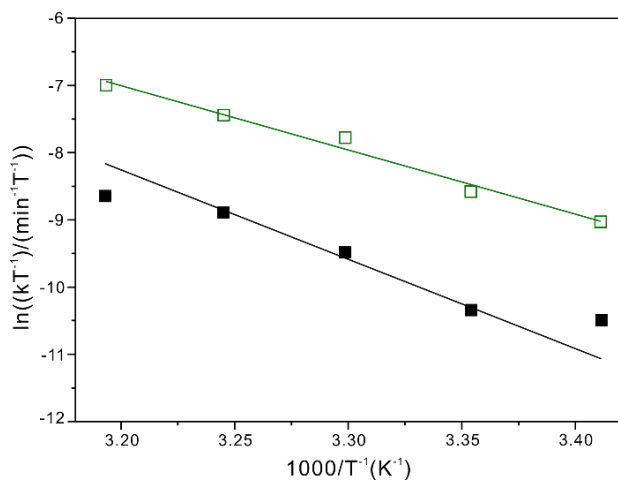

**Fig. S5** Eyring plot for the catalytic reduction reactions of 80 μM 4-NP(aq) catalyzed via pristine Cu<sub>2</sub>O cubes (closed) and CuO/Cu<sub>2</sub>O(0.3 M) composites (open) in the presence of NaBH<sub>4</sub>.

**Table S1** Comparison of the catalytic activity of CuO/Cu<sub>2</sub>O(0.3 M) composites with literature values

| <b>Catalyst</b>              | <b>k<br/>(min<sup>-1</sup>)</b> | <b>Concentration of 4-<br/>nitrophenol (μM)</b> | <b>Concentration of<br/>NaBH<sub>4</sub> (mM)</b> | <b>A dose of catalyst<br/>(mg L<sup>-1</sup>)</b> | <b>Reference</b> |
|------------------------------|---------------------------------|-------------------------------------------------|---------------------------------------------------|---------------------------------------------------|------------------|
| CuO/Cu <sub>2</sub> O(0.3 M) | 0.126                           | 80                                              | 2.0                                               | 18                                                | this work        |
| CuO                          | 0.088                           | 100                                             | 5.0                                               | 333                                               | 9                |
| MnO <sub>2</sub>             | 0.022                           | 100                                             | 5.0                                               | 333                                               | 9                |
| CuO                          | 0.142                           | 60                                              | 5.0                                               | 100                                               | 1                |
